# Supplementary material for: Microfluidic patterning of nanodisc lipid bilayers and multiplexed analysis of protein interaction
Source: Royal Society of Chemistry journal article supplement (doi:10.1039/b806733c), 2008-01-01
Supplement: b806733c.pdf [file b806733c.pdf]

## Supporting Information:

### Microfluidic Patterning of Nanodisc Lipid Bilayers and Multiplexed Analysis of Protein Interaction

*Edgar D. Goluch<sup>1#</sup>, Andrew W. Shaw<sup>2#</sup>, Stephen G. Sligar<sup>2,3,4\*</sup>, Chang Liu<sup>1,5, 6\*</sup>*

<sup>1</sup>Department of Bioengineering, <sup>2</sup>Department of Chemistry, <sup>3</sup>Department of Biochemistry, and  
<sup>4</sup>College of Medicine

University of Illinois, Urbana, Illinois 61801.

<sup>5</sup>Department of Mechanical Engineering

<sup>6</sup>Department of Electrical Engineering and Computer Science

Northwestern University, Evanston, Illinois 60208

\*Corresponding authors. Emails: [s-sligar@uiuc.edu](mailto:s-sligar@uiuc.edu); [changliu@northwestern.edu](mailto:changliu@northwestern.edu)

<sup>#</sup>These authors contributed equally to this work.

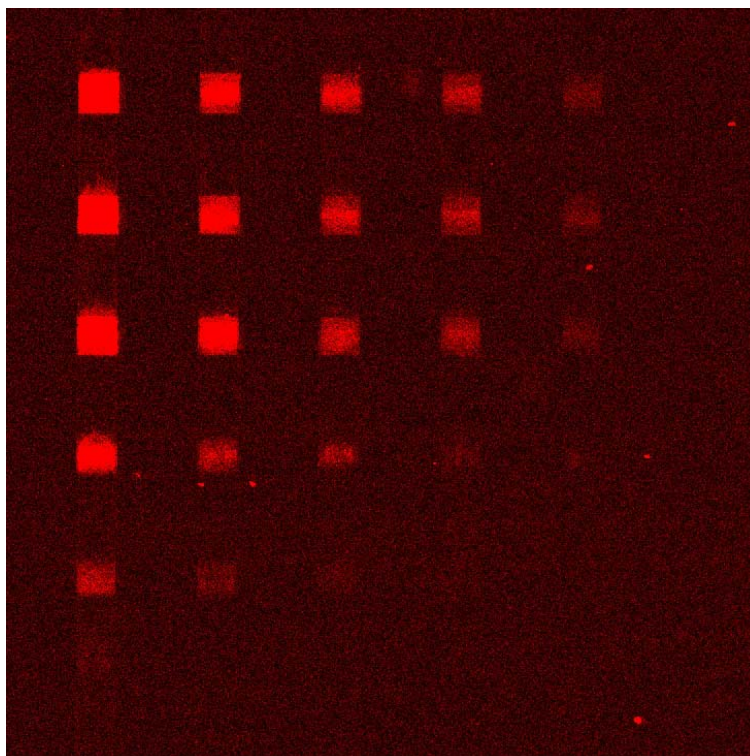

**S1.** Raw data used for generating the graph in Figure 4B.

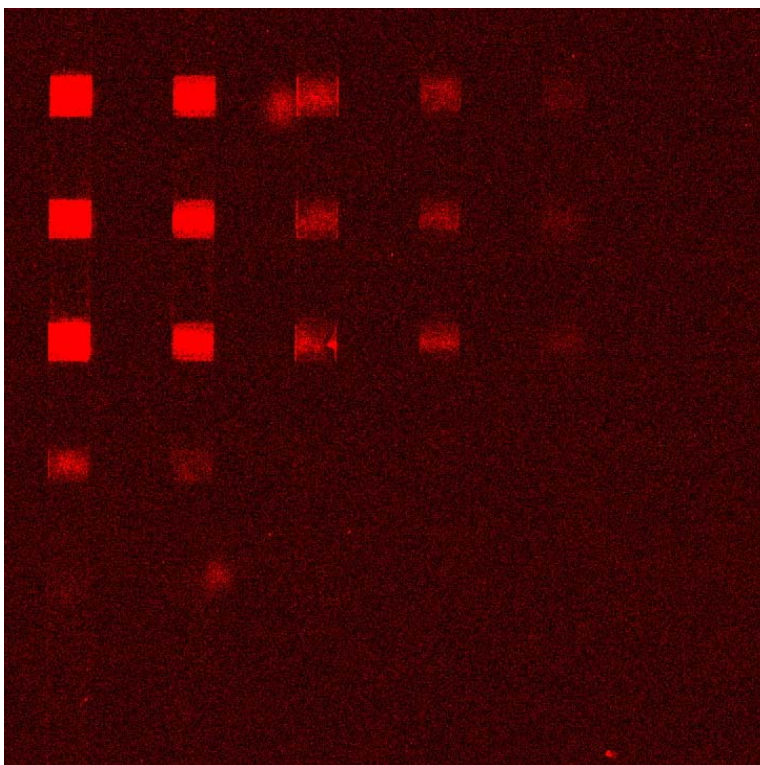

**S2.** Raw data used for generating the graph in Figure 4B.

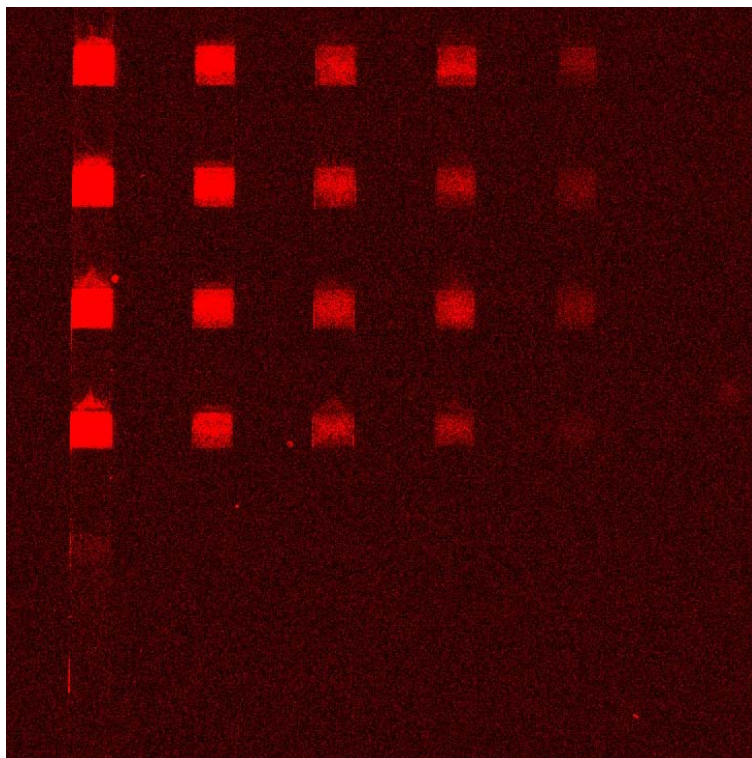

**S3.** Raw data used for generating the graph in Figure 4B.



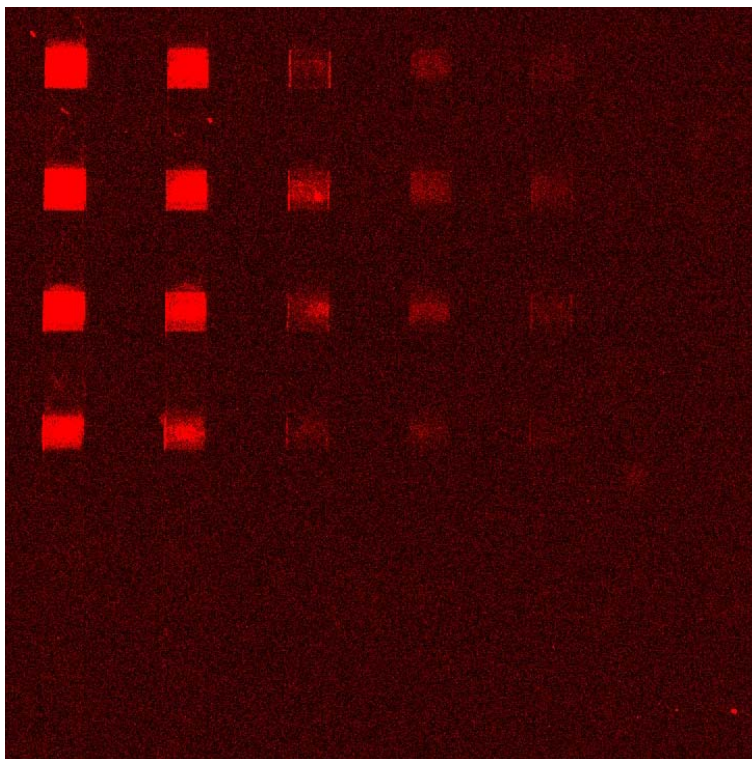

**S4.** Raw data used for generating the graph in Figure 4B.

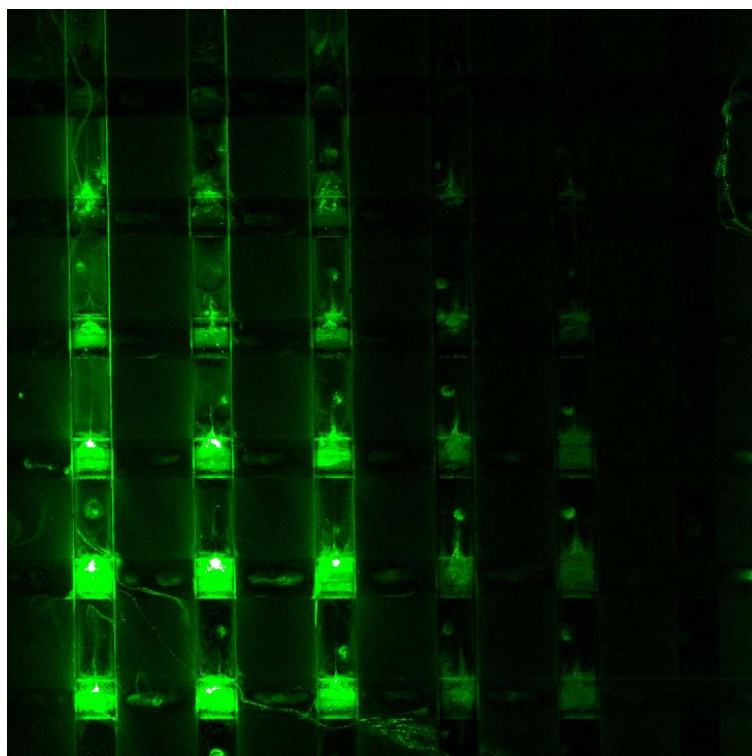

**S5.** Raw data used for generating the graph in Figure 5B.

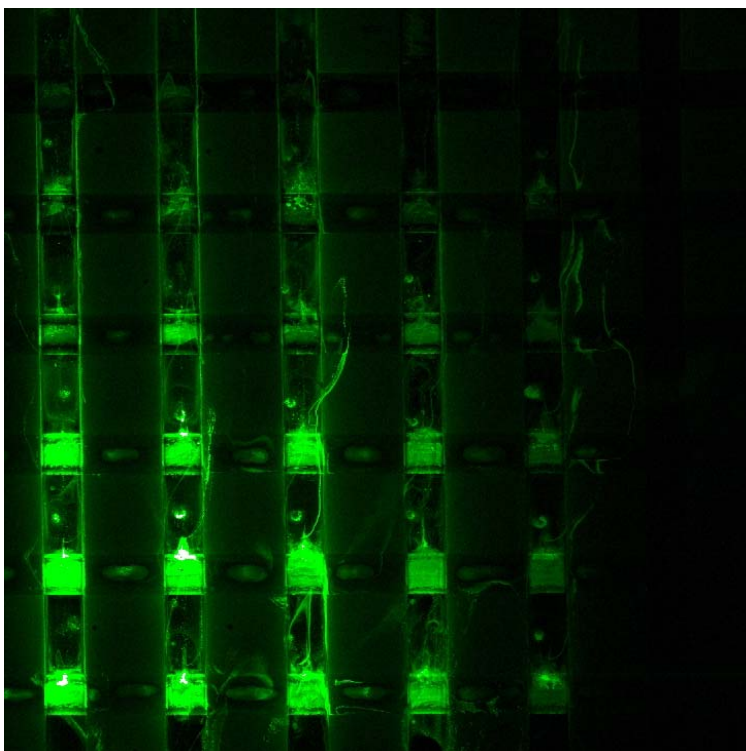

**S6.** Raw data used for generating the graph in Figure 5B.

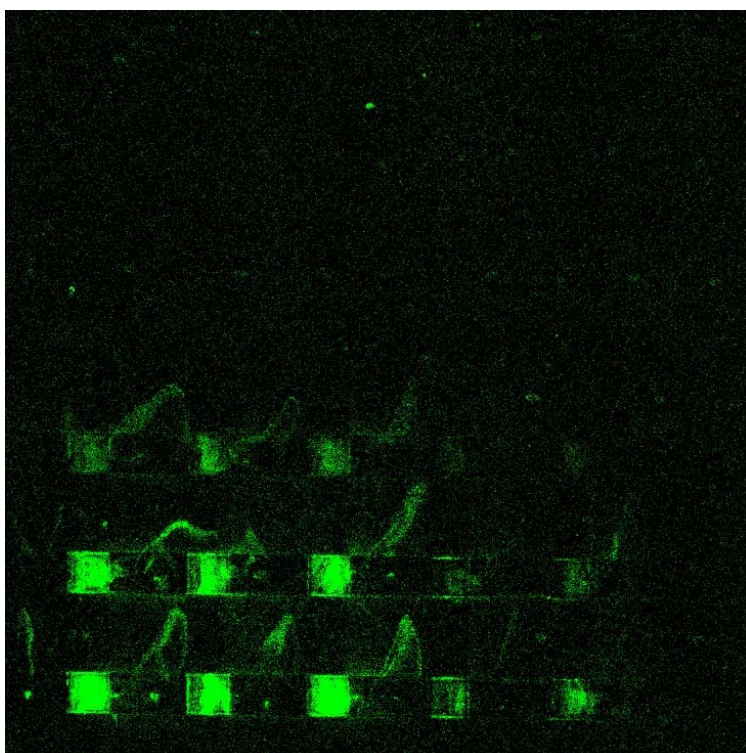

**S7.** Raw data used for generating the graph in Figure 5B.



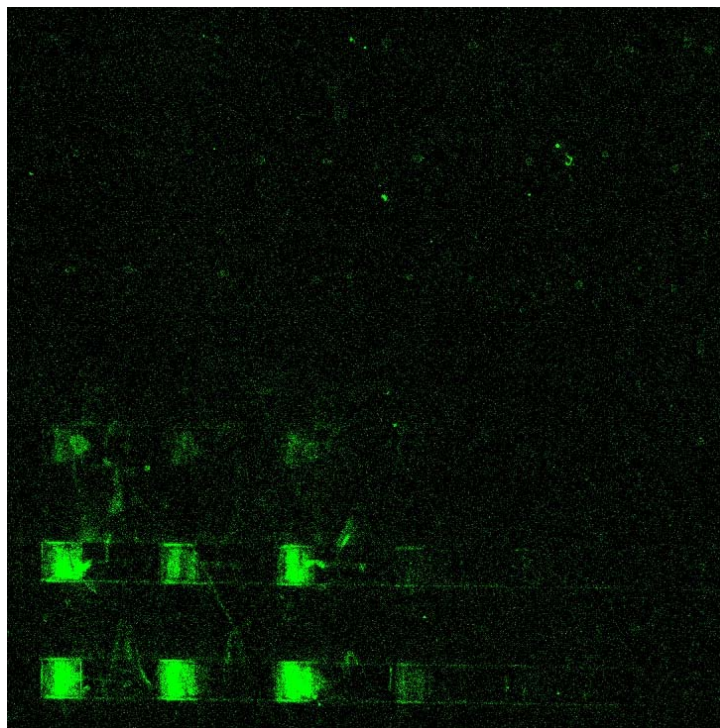

**S8.** Raw data used for generating the graph in Figure 5B.

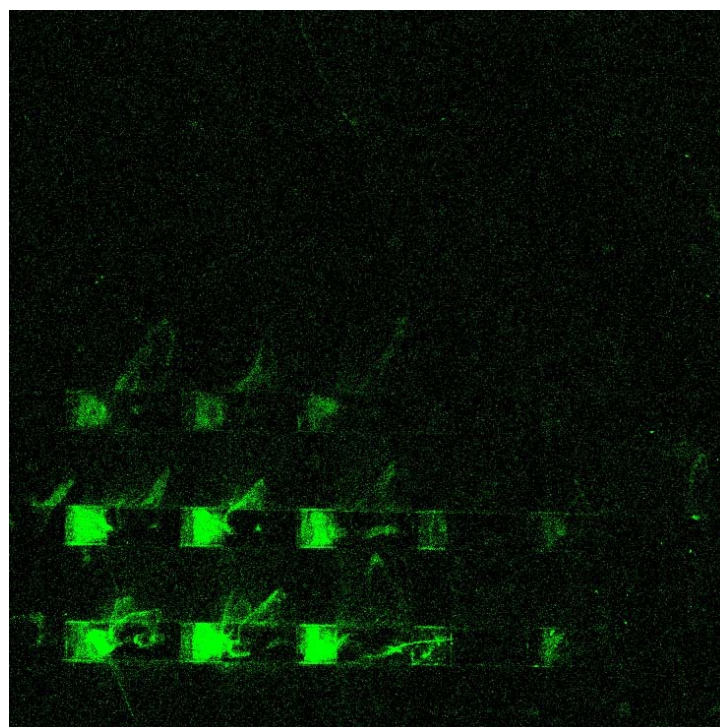

**S9.** Raw data used for generating the graph in Figure 5B.

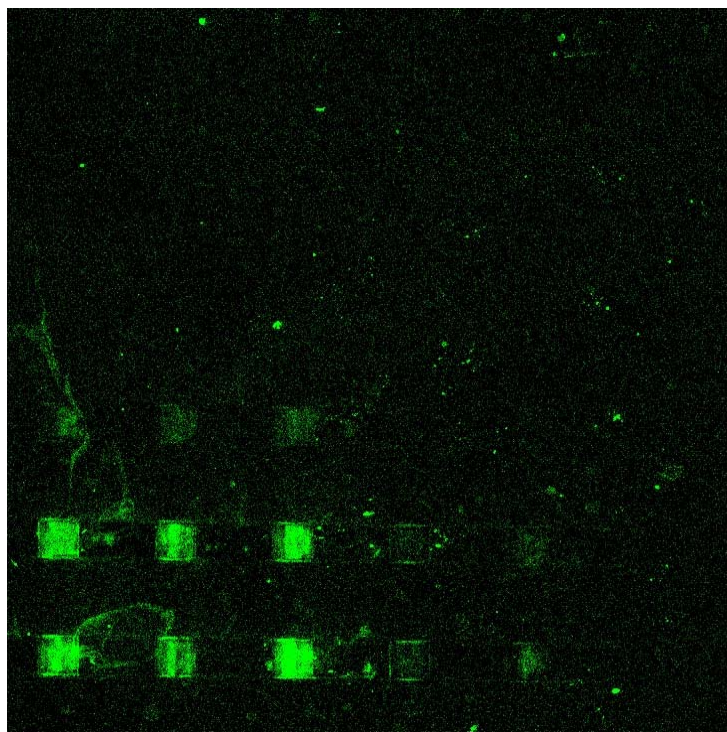

**S10.** Raw data used for generating the graph in Figure 5B.

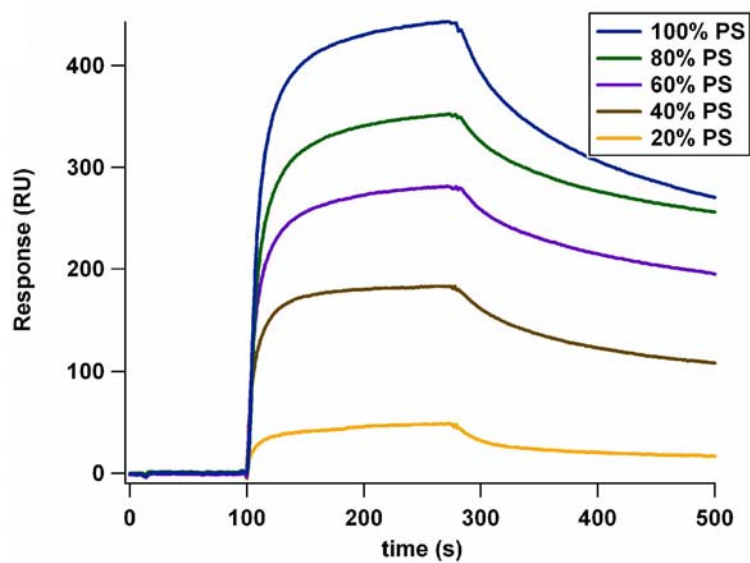

**S11.** SPR results of annexin binding to PS Nanodiscs. The graph shows binding curves of 250 nM annexin to Nanodiscs of various PS content generated using 3 minute kinetic injections.
